# Supplementary material
Source: publisher site journal article supplement (https://www.dovepress.com/article/566750)
Supplement: Supplementary file 1 [file 566750%20Supplementary%20Material.docx]

**Supplementary files**

S1. Teachers’ distribution based on their affiliated department

| **Department** | **Frequency** | **Percentage** |
| --- | --- | --- |
| ***Pre-clinic**** | ***59*** | ***47.2*** |
| Oral Biology & Biomedical | 25 | 20 |
| Oral Health Community/ Public Health | 26 | 20.8 |
| Dental Technology & Material | 8 | 6.4 |
| ***Clinic**** | ***66*** | ***52.8*** |
| Oral & Maxillofacial Surgery | 7 | 5.6 |
| Odontology Forensic | 4 | 3.2 |
| Dental Radiology | 9 | 7.2 |
| Pediatric Dentistry | 7 | 5.6 |
| Conservative Dentistry | 8 | 6.4 |
| Orthodontic | 8 | 6.4 |
| Oral Disease | 12 | 9.6 |
| Periodontic | 4 | 3.2 |
| Prosthodontic | 7 | 5.6 |
| Total | 125 | 100 |
| *Department category |  |  |

S2. Candidate teachers’ attitude towards EBP

| **Attitude items** | **Strongly Agree**  n(%) | **Agree**  n(%) | **Neutral**  n(%) | **Disagree**  n(%) | **Strongly disagree**  n(%) | **Mean (SD)** |
| --- | --- | --- | --- | --- | --- | --- |
| I need more training in EBP. | 64 (51.2) | 51 (40.8) | 6 (4.8) | 3 (2.4) | 1 (0.8) | 4.4 (0.8) |
| In my opinion EBP does not consider patients’ views and ideas. (r) | 12 (9.6) | 67 (53.6) | 31 (24.8) | 9 (7.2) | 6 (4.8) | 3.6 (0.9) |
| Evidence based dentistry facilitates clinical decision making. | 65 (52.0) | 53 (42.4) | 4 (3.2) | 2 (1.6) | 1 (0.8) | 4.4 (0.7) |
| In my view scientific evidence is an appropriate clinical guidance for practicing dentistry. | 70 (56.0) | 47 (37.6) | 6 (4.8) | 0 (0.0) | 2 (1.6) | 4.5 (0.7) |
| In my opinion dental care or services can be provided perfectly without the EBP approach. (r) | 34 (27.2) | 65 (52.0) | 19 (15.2) | 4 (3.2) | 3 (2.4) | 4.0 (0.9) |
| Types of dental services provided are limited, and EBP approach is not necessary. (r) | 48 (38.4) | 61 (48.8) | 9 (7.2) | 3 (2.4) | 4 (3.2) | 4.2 (0.9) |
| EBP promotes quality of oral health care. | 64 (51.2) | 58 (46.4) | 2 (1.6) | 0 (0.0) | 1 (0.8) | 4.5 (0.6) |
| In my view limitations in accessing scientific information sources in Indonesia is a great obstacle for implementing EBP approach. | 31 (24.8) | 69 (55.2) | 13 (10.4) | 9 (7.2) | 3 (2.4) | 3.9 (0.9) |
| EBP is not a necessity and there is the possibility of patient referral. (r) | 41 (32.8) | 65 (52.0) | 14 (11.2) | 4 (3.2) | 1 (0.8) | 4.1 (0.8) |
| **Total score** |  |  |  |  |  | **37.5 (±4.4)** |

S3. Self-reported needs and willingness to teach EBP topics and subtopics.

| **EBP topics and subtopics** | **Need to learn more**  **n (%)** | **Need teaching material support**  **n (%)** | **Willing to teach/ share materials**  **n (%)** |
| --- | --- | --- | --- |
| **i. Introductory** | | | |
| (1) The steps of EBP | 88 (70.4) | 72 (57.6) | 16 (12.8) |
| (2) The strengths, limitations and barriers of EBP | 86 (68.8) | 81 (64.8) | 18 (14.4) |
| (3) The philosophy of EBP | 89 (71.2) | 76 (60.8) | 19 (15.2) |
| **ii. Question formulation (ask)** | | |  |
| (4) Formulate clinically questions using the PICO format or its variations | 84 (67.2) | 77 (61.6) | 20 (16) |
| (5) Guided literature search by the background questions or foreground questions (clinical questions) | 86 (68.8) | 75 (60) | 19 (15.2) |
| **iii. Acquire evidence (search)** | | | |
| (6) Construct a focused search with Boolean operator in a database | 80 (64) | 70 (56) | 17 (13.6) |
| (7) Locate clinical evidence using electronic databases (e.g. Pubmed) | 78 (62.4) | 78 (62.4) | 24 (19.2) |
| (8) Recognize other research database & database of filtered/ pre-appraised evidence | 88 (70.4) | 77 (61.6) | 16 (12.8) |
| **iv. Critical appraisal and interpretation** | | | |
| (9) Study designs and their major strength and limitations | 80 (64) | 78 (62.4) | 24 (19.2) |
| (10) Assessing the relevance of study design to the question asked | 82 (65.6) | 78 (62.4) | 19 (15.2) |
| (11) Hierarchy or levels of evidence | 80 (64) | 75 (60) | 21 (16.8) |
| (12) Difference between narrative, systematic review, and meta-analysis | 92 (73.6) | 78 (62.4) | 21 (16.8) |
| (13) Difference between clinical and statistical significance | 90 (72) | 77 (61.6) | 20 (16) |
| (14) Interpreting p-value, confidence interval | 85 (68) | 80 (64) | 19 (15.2) |
| (15) Understanding the common measures of effect (such as odds ratio, relative risk reduction/increase, absolute risk difference, relative risk /risk ratio, hazard ratio, NNT/NNH and power calculation) | 90 (72) | 71 (56.8) | 18 (14.4) |
| (16) Understanding sensitivity, specificity, prevalence and incidence | 90 (72) | 71 (56.8) | 21 (16.8) |
| (17) Use of appraisal tool(s) to assess validity | 97 (77.6) | 71 (56.8) | 16 (12.8) |
| (18) Ways in which study validity can be threatened | 91 (72.8) | 72 (57.6) | 18 (14.4) |
| (19) Difference between internal and external validity | 88 (70.4) | 75 (60) | 18 (14.4) |
| (20) Critical appraisal of systematic reviews and meta-analysis | 97 (77.6) | 73 (58.4) | 19 (15.2) |
| (21) Interpreting forest plots in systematic reviews/ meta-analysis | 93 (74.4) | 68 (54.4) | 15 (12) |
| (22) Critical appraisal of studies about intervention | 92 (73.6) | 68 (54.4) | 16 (12.8) |
| (23) Critical appraisal of studies about diagnosis | 94 (75.2) | 65 (52) | 15 (12) |
| (24) Critical appraisal of studies about prognosis | 94 (75.2) | 68 (54.4) | 16 (12.8) |
| **v. Implementation and communication (apply)** | | | |
| (25) Interpret the grading of the certainty in evidence and the strength of recommendations | 92 (73.6) | 68 (54.4) | 11 (8.8) |
| (26) Communicate the recommendation from EBP process to the patient | 93 (74.4) | 70 (56) | 15 (12) |
| (27) Clinical decision considering the patient’s value and preferences with shared-decision making | 92 (73.6) | 71 (56.8) | 16 (12.8) |
| **vi. Evaluation** | | | |
| (28) Evaluation of the EBP implementation | 95 (76) | 73 (58.4) | 14 (11.2) |
| **vii. Teaching EBP** | | | |
| (29) The principles of effective EBP teaching | 94 (75.2) | 73 (58.4) | 13 (10.4) |
| (30) Useful EBP teaching methods | 93 (74.4) | 75 (60) | 12 (9.6) |
